# Supplementary material
Source: Springer Nature journal article supplement (https://www.springermedizin.de/resource/supplementary/13051_2012_264_MOESM2_ESM.pdf/9670280)

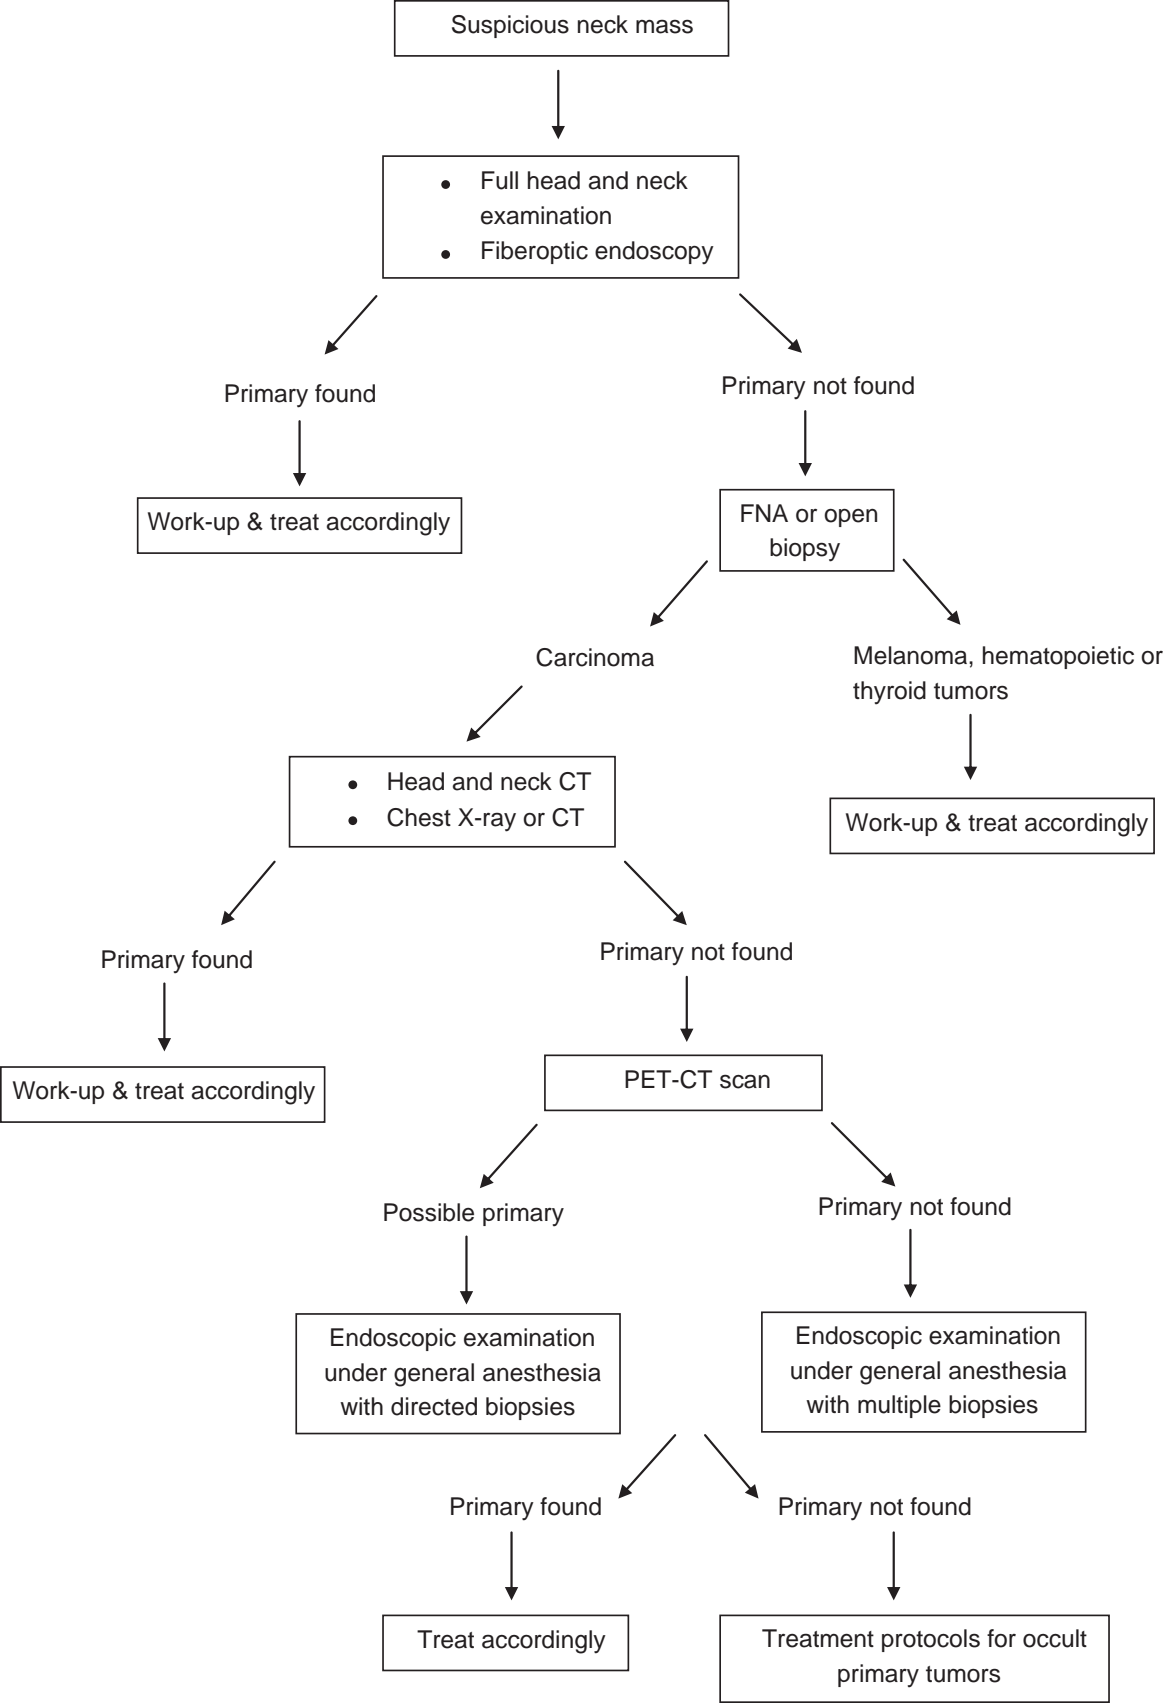

Supplement: MOESM2 [file 9670280]
